# Supplementary material
Source: publisher figshare collection journal article supplement (https://karger.figshare.com/ndownloader/files/29017173)
Supplement: Supplementary file 1 [file 29017173]

**Supplement Table 1: Newcastle-Ottawa quality assessment scale of included studies in meta-analysis**

| First author, year | Selection | | | | Comparability  (Confounding) | Outcome | | | Total score |
| --- | --- | --- | --- | --- | --- | --- | --- | --- | --- |
| Represent-ativeness | Selection of the non-exposed cohort | Ascertainment | Endpoint does not present at start | Assessment of outcome | Follow-up duration | Adequacy follow-up |
| Ghiselli 2019 | 1 | 1 | 1 | 1 | 2 | 1 | 1 | 1 | 9 |
| Ho 2004 | 1 | 1 | 1 | 1 | 2 | 0 | 1 | 1 | 8 |
| Huang 2020 | 1 | 1 | 1 | 1 | 1 | 0 | 1 | 1 | 7 |
| Huurman 2020 | 1 | 1 | 0 | 1 | 1 | 1 | 1 | 0 | 6 |
| Lo 2019 | 1 | 1 | 1 | 1 | 2 | 1 | 1 | 0 | 8 |
| Meghji 2019 | 1 | 1 | 1 | 1 | 2 | 1 | 1 | 1 | 9 |
| Montenegro 2020 | 1 | 1 | 1 | 0 | 2 | 1 | 1 | 0 | 7 |
| Rowin 2019 | 1 | 1 | 1 | 1 | 1 | 1 | 1 | 0 | 7 |
| Terauchi 2014 | 1 | 1 | 1 | 1 | 2 | 1 | 1 | 1 | 9 |
| Velzen 2018 | 1 | 1 | 1 | 1 | 1 | 1 | 1 | 1 | 8 |
| Wang 2014 | 1 | 1 | 1 | 1 | 2 | 1 | 1 | 0 | 8 |

Notes: The Newcastle-Ottawa scale uses a star system (0 to 9) to evaluate included studies on 3 domains: selection, comparability, and outcomes. Star (*)= item presents. Maximum 1 star (*) for selection and outcome components and 2 stars (**) for comparability components. Higher scores represent higher study quality.
